# Supplementary material
Source: publisher site journal article supplement (https://www.spandidos-publications.com/7495/downloadSupplementary)
Supplement: Supplementary file 1 [file downloadSupplementary]

Table SI. Antibodies used in the study.

| Antibodies                     | Manufacturer | Cat. no.   | Dilutions |
|--------------------------------|--------------|------------|-----------|
| AEBP1                          | Abcam        | ab168355   | 1:1,000   |
| Cyclin D1                      | Proteintech  | 26939-1-AP | 1:5,000   |
| Bcl-2                          | Proteintech  | 12789-1-AP | 1:2,000   |
| Bax                            | Proteintech  | 50599-2-Ig | 1:2,000   |
| AKT                            | Proteintech  | 10176-2-AP | 1:2,000   |
| p-AKT                          | Abcam        | ab38449    | 1:1,000   |
| $\beta$ -actin                 | Abcam        | ab213262   | 1:1,000   |
| Goat anti-rabbit IgG H&L (HRP) | Abcam        | ab205718   | 1:10,000  |

AEBP1, adipocyte enhancer-binding protein 1; p-, phosphorylated; HRP, horseradish peroxidase.
